# Supplementary material for: Inflammation Promotes Expression of Stemness-Related Properties in HBV-Related Hepatocellular Carcinoma
Source: PubMed Central journal article supplement (PMC4769282; doi:10.1371/journal.pone.0149897), 2016-02-26

# Supporting information

S1 Fig. Correlations of the levels of MCP-1/CD68 and pluripotent transcription factors OCT4 and NANOG in HBV-HCC or HBV-negative HCC tissues.

(A) HBV-HCC,  $n = 57$  (B) HBV negative (NBNC and HCV)-HCC,  $n = 53$ .

Spearman's correlation.

A

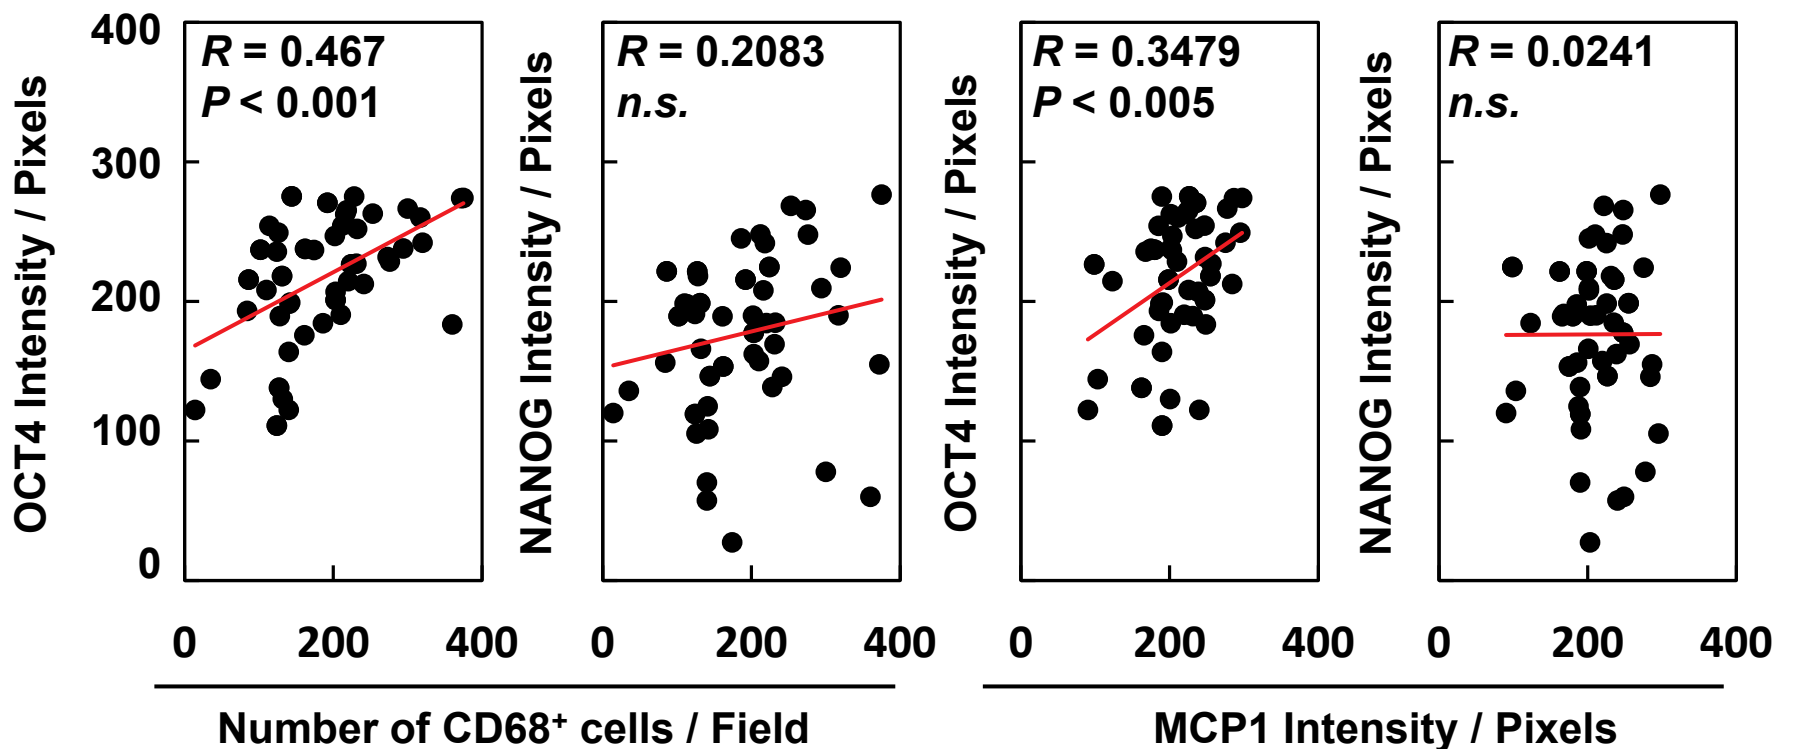

B

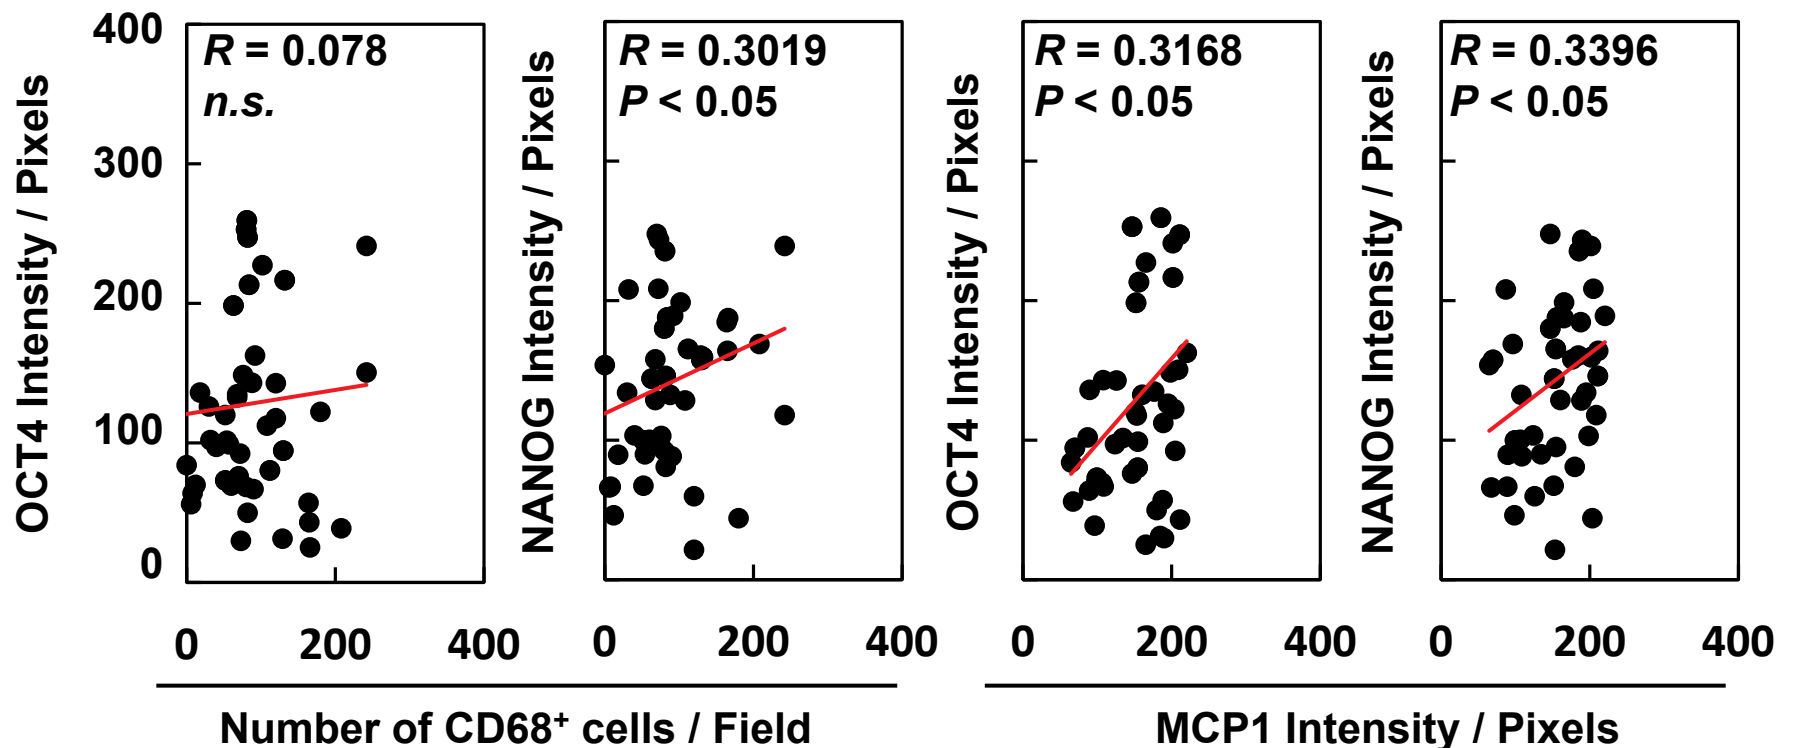

Supplement: pone.0149897.s001.pdf [file pone.0149897.s001.pdf]
