# Supplementary material for: Inflammation Promotes Expression of Stemness-Related Properties in HBV-Related Hepatocellular Carcinoma
Source: PubMed Central journal article supplement (PMC4769282; doi:10.1371/journal.pone.0149897), 2016-02-26
Supplement: pone.0149897.s004.pdf [file pone.0149897.s004.pdf]

**S2 Table List of antibodies**

| <b>Protein</b> | <b>Assay</b> | <b>Ab Cat. No.</b> | <b>Company</b>         | <b>Origin</b> | <b>Dilution</b> | <b>Incubation Period</b> |
|----------------|--------------|--------------------|------------------------|---------------|-----------------|--------------------------|
| OCT4           | IHC          | sc-5279            | Santa Cruz Biotech     | mouse         | 1:100           | overnight, 4°C           |
| NANOG          | IHC          | ab21624            | Abcam                  | rabbit        | 1:100           | overnight, 4°C           |
| MCP1           | IHC          | sc-1784            | Santa Cruz Biotech     | goat          | 1:200           | overnight, 4°C           |
| CD68           | IHC          | Ab955              | Abcam                  | mouse         | 1:200           | overnight, 4°C           |
| Control IgG    | IHC          | #76870             | Jackson ImmunoResearch | rabbit        |                 | overnight, 4°C           |
| OCT4           | WB           | sc-5279            | Santa Cruz Biotech     | mouse         | 1:1000          | overnight, 4°C           |
| NANOG          | WB           | RCAB002P-F         | ReproCell              | rabbit        | 1:1000          | overnight, 4°C           |
| p-IGF-IR       | WB           | sc-101703          | Santa Cruz Biotech     | rabbit        | 1:1000          | overnight, 4°C           |
| IGF-IR $\beta$ | WB           | sc-713             | Santa Cruz Biotech     | rabbit        | 1:1000          | overnight, 4°C           |
| p-AKT (Ser473) | WB           | #9271              | Cell Signaling         | rabbit        | 1:1000          | overnight, 4°C           |
| AKT            | WB           | sc-8312            | Santa Cruz Biotech     | rabbit        | 1:200           | overnight, 4°C           |
| EGFP           | WB           | sc-9996            | Santa Cruz Biotech     | mouse         | 1:200           | overnight, 4°C           |
| N-CADHERIN     | WB           | 610921             | BD                     | mouse         | 1:2000          | overnight, 4°C           |
| SLUG           | WB           | #9585              | Cell Signaling         | rabbit        | 1:1000          | overnight, 4°C           |
| $\beta$ -Actin | WB           | sc-47778           | Santa Cruz Biotech     | mouse         | 1:1000          | overnight, 4°C           |

**WB, western blot; IHC, immunohistochemistry.**
